# Supplementary material
Source: Springer Nature journal article supplement (https://www.springermedizin.de/resource/supplementary/12943_2009_561_MOESM13_ESM.pdf/9554974)

**A**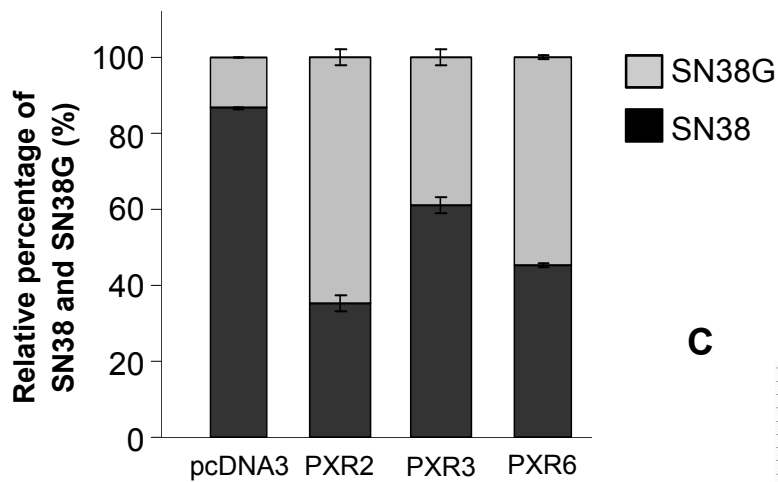**B**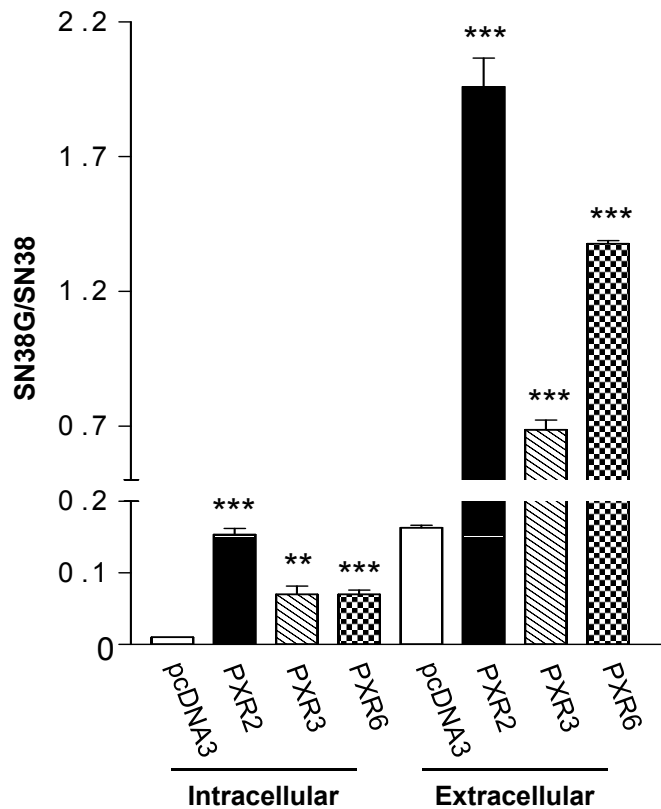**C**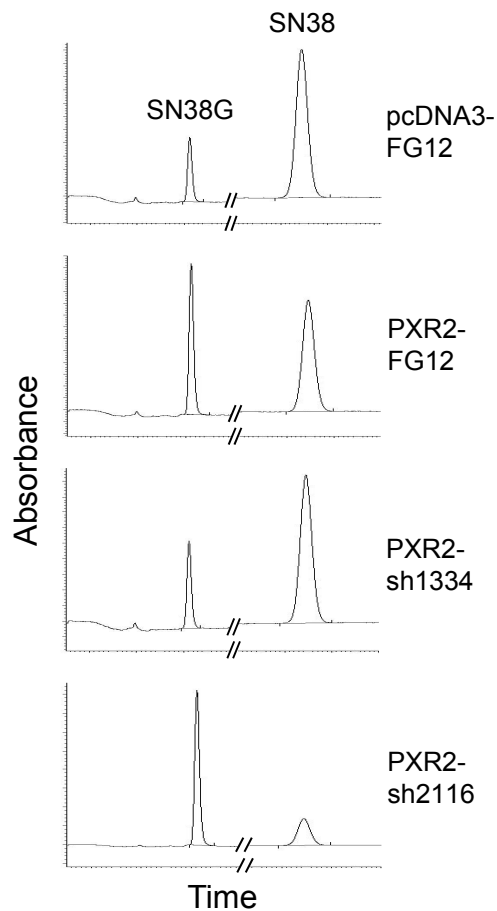

Supplement: MOESM13 [file 9554974]
